# Supplementary material for: The role of the histone H3 variant CENPA in prostate cancer
Source: PubMed Central journal article supplement (PMC7307189; doi:10.1074/jbc.ra119.010080), 2020-05-05
Supplement: supp_RA119.010080_154133_2_supp_509551_q8l4fr.pdf [file supp_RA119.010080_154133_2_supp_509551_q8l4fr.pdf]

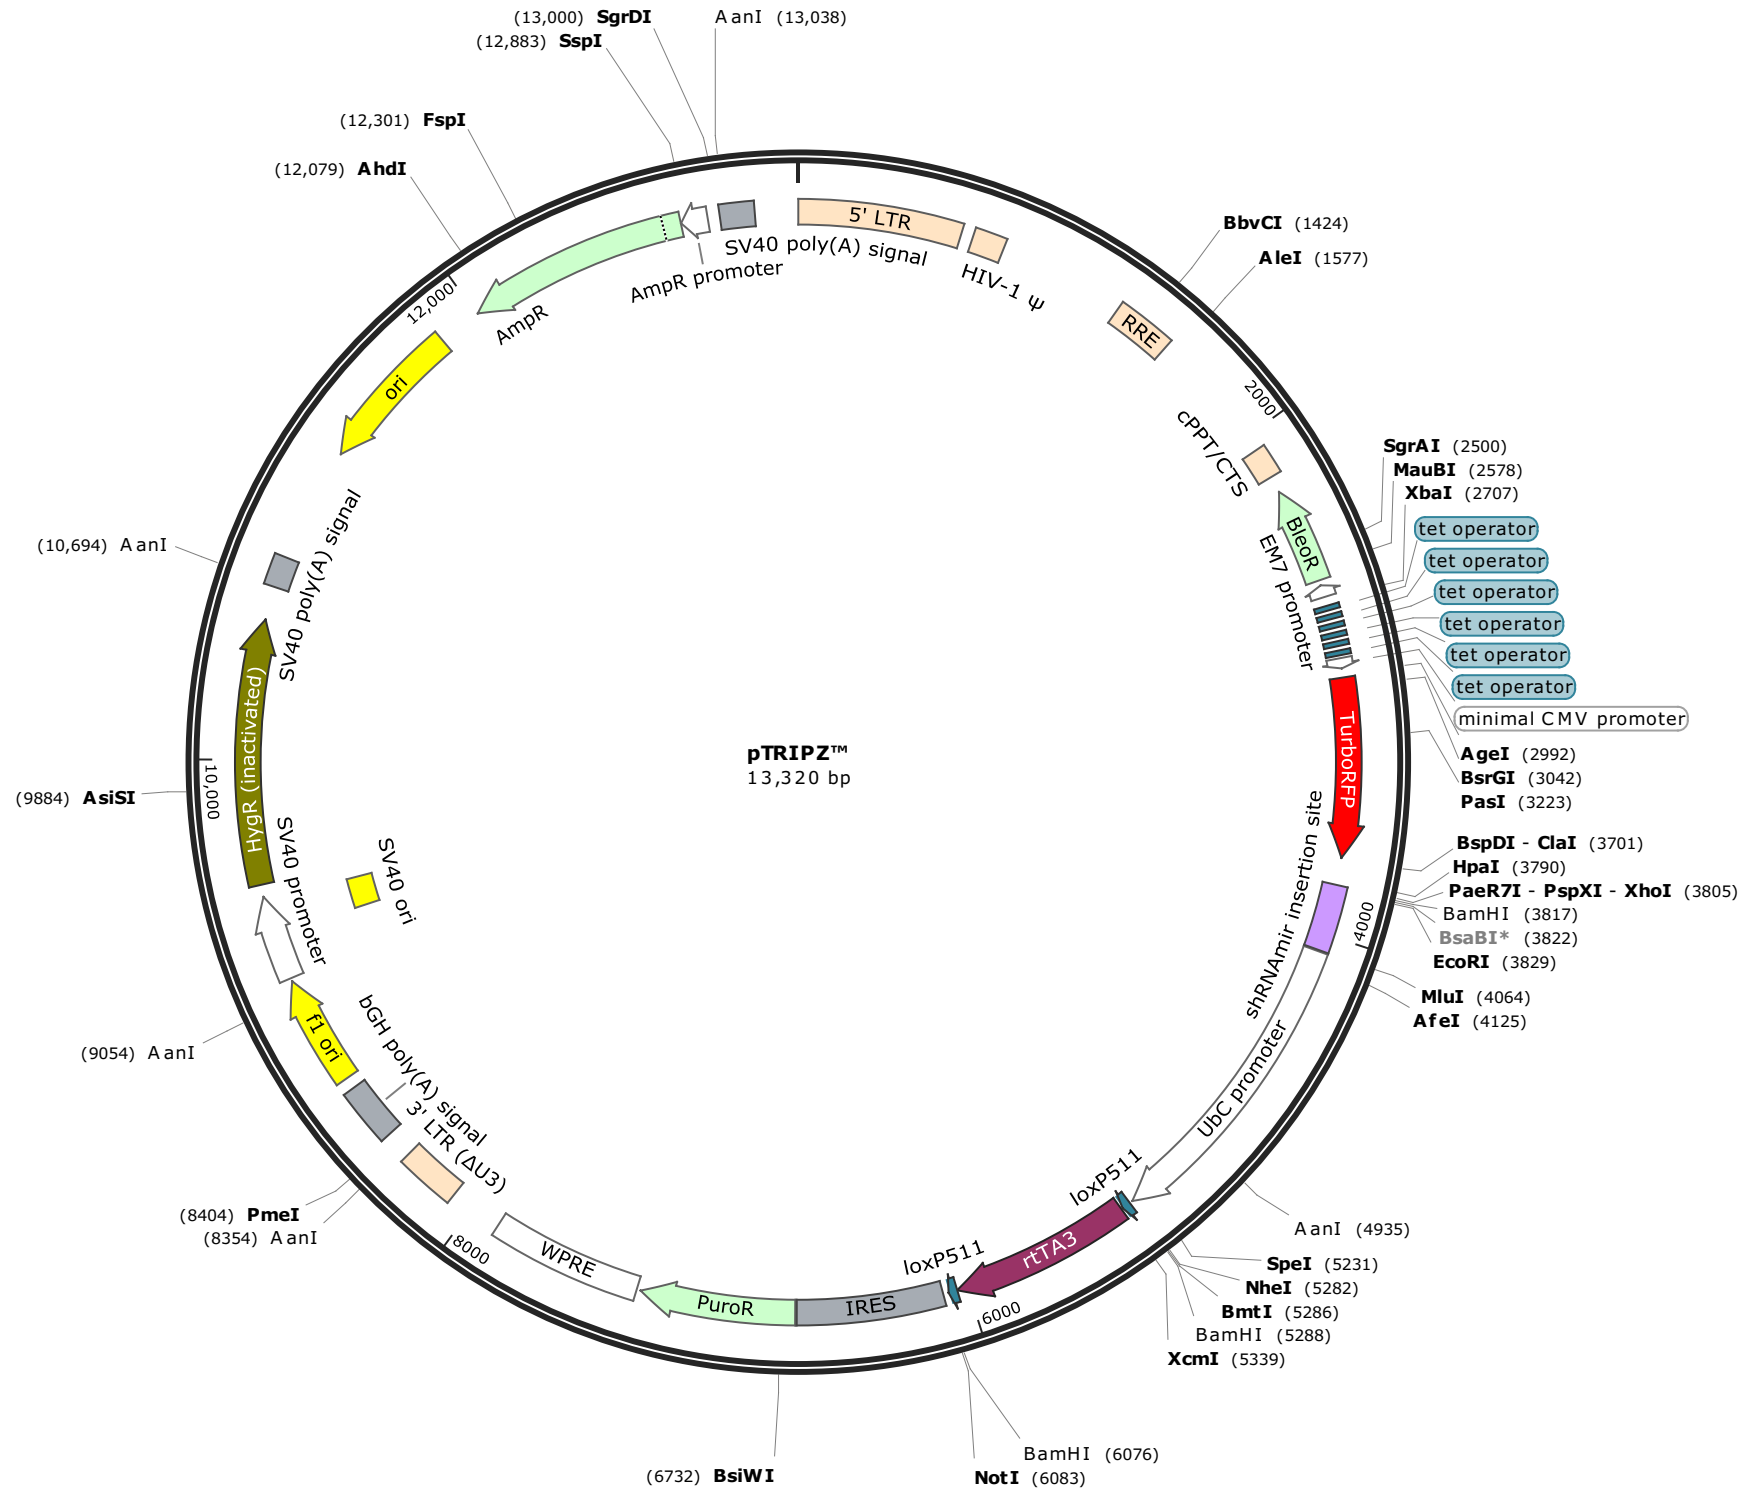

## Vector Summary

|                             |                                                    |
|-----------------------------|----------------------------------------------------|
| Vector ID                   | VB170517-1083gzp                                   |
| Vector Name                 | pLV[Exp]-mCherry-EF1A>{ORF_91bp}                   |
| Date Created (Pacific Time) | 2017-05-17                                         |
| Size                        | 8796 bp                                            |
| Vector Type                 | Lentivirus gene expression vector (3rd generation) |
| Inserted Promoter           | EF1A                                               |
| Inserted ORF                | {ORF_91bp}                                         |
| Inserted Marker             | mCherry                                            |
| Plasmid Copy Number         | High                                               |
| Antibiotic Resistance       | Ampicillin                                         |
| Cloning Host                | Stbl3                                              |
| Vector Description          | <i>None</i>                                        |

## Vector Map

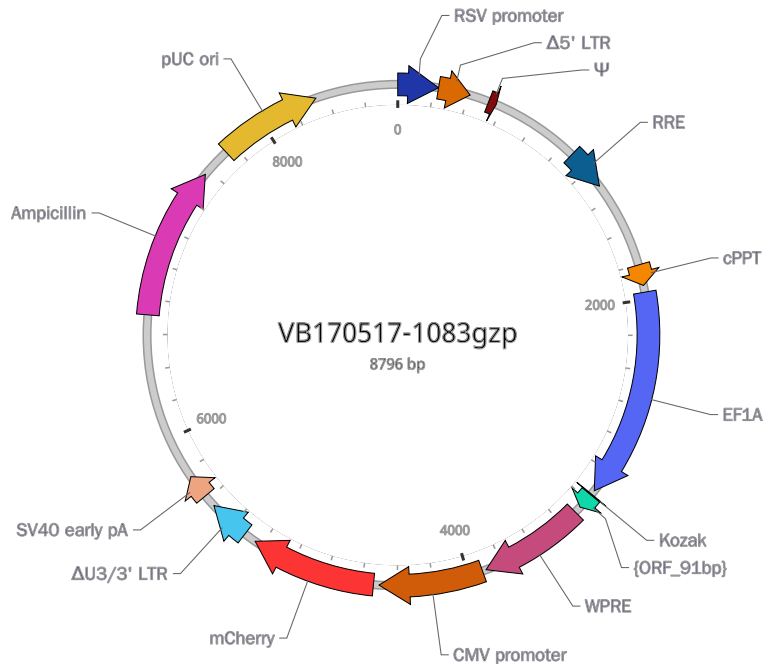

## Vector Components

| Name              | Position    | Size (bp) | Type          | Description                                                      | Application Notes                                                                                                                                                                            |
|-------------------|-------------|-----------|---------------|------------------------------------------------------------------|----------------------------------------------------------------------------------------------------------------------------------------------------------------------------------------------|
| RSV promoter      | ■ 1-229     | 229       | Promoter      | Rous sarcoma virus enhancer/promoter                             | Strong promoter; drives transcription of viral RNA in packaging cells.                                                                                                                       |
| Δ5' LTR           | ■ 230-410   | 181       | LTR           | Truncated HIV-1 5' long terminal repeat                          | Allows transcription of viral RNA and its packaging into virus.                                                                                                                              |
| Ψ                 | ■ 521-565   | 45        | Miscellaneous | HIV-1 packaging signal                                           | Allows packaging of viral RNA into virus.                                                                                                                                                    |
| RRE               | ■ 1075-1308 | 234       | Miscellaneous | HIV-1 Rev response element                                       | Rev protein binding site that allows Rev-dependent nuclear export of viral RNA during viral packaging.                                                                                       |
| cPPT              | ■ 1803-1920 | 118       | Miscellaneous | Central polypurine tract                                         | Facilitates the nuclear import of HIV-1 cDNA through a central DNA flap.                                                                                                                     |
| <b>EF1A</b>       | ■ 1959-3137 | 1179      | Promoter      | Human eukaryotic translation elongation factor 1 α1 promoter     | Strong promoter.                                                                                                                                                                             |
| Kozak             | ■ 3162-3167 | 6         | Miscellaneous | Kozak translation initiation sequence                            | Facilitates translation initiation of ATG start codon downstream of the Kozak sequence.                                                                                                      |
| <b>{ORF_91bp}</b> | ■ 3168-3258 | 91        | ORF           | <i>None</i>                                                      | <i>None</i>                                                                                                                                                                                  |
| WPRE              | ■ 3297-3894 | 598       | Miscellaneous | Woodchuck hepatitis virus posttranscriptional regulatory element | Enhances viral RNA stability in packaging cells, leading to higher titer of packaged virus.                                                                                                  |
| CMV promoter      | ■ 3916-4503 | 588       | Promoter      | Human cytomegalovirus immediate early enhancer/promoter          | Strong promoter; may have variable strength in some cell types.                                                                                                                              |
| <b>mCherry</b>    | ■ 4535-5245 | 711       | ORF           | Variant of mRFP1 generated by mutagenesis                        | Commonly used red fluorescent protein; fast maturation compared to its predecessor, mRFP1.                                                                                                   |
| ΔU3/3' LTR        | ■ 5316-5550 | 235       | LTR           | Truncated HIV-1 3' long terminal repeat                          | Allows packaging of viral RNA into virus; self-inactivates the 5' LTR by a copying mechanism during viral genome integration; contains polyadenylation signal for transcription termination. |
| SV40 early pA     | ■ 5623-5757 | 135       | PolyA_signal  | Simian virus 40 early polyadenylation signal                     | Allows transcription termination and polyadenylation of mRNA transcribed by Pol II RNA polymerase.                                                                                           |
| Ampicillin        | ■ 6711-7571 | 861       | ORF           | Ampicillin resistance gene                                       | Allows E. coli to be resistant to ampicillin.                                                                                                                                                |
| pUC ori           | ■ 7742-8330 | 589       | rep_origin    | pUC origin of replication                                        | Facilitates plasmid replication in E. coli; regulates high-copy plasmid number (500-700).                                                                                                    |

**Note:** Components added by user are listed in **bold red** text.

## Vector Sequence

```

1  AATGTAGTCT TATGCAATAC TCTTGTAGTC TTGCAACATG GTAACGATGA GTTAGCAACA TGCCTTACAA GGAGAGAAAA AGCACCGTGC ATGCCGATTG
101 GTGGAAGTAA GGTGGTACGA TCGTGCCTTA TTAGGAAGGC AACAGACGGG TCTGACATGG ATTGGACGAA CCACTGAATT GCCGCATTGC AGAGATATTG
201 TATTTAAGTG CTAGACTCGA TACATAAAGC GGTCTCTCTG GTTAGACCAG ATCTGAGCCT GGGAGCTCTC TGGCTAACTA GGGAAACCCAC TGCTTAAGCC
301 TCAATAAAGC TTGCCTTGAG TGCTTCAAGT AGTGTGTGCC CGTCTGTTGT GTGACTCTGG TAACTAGAGA TCCCTCAGAC CCTTTTAGTC AGTGTGAAAA
401 ATCTCTAGCA GTGGCGCCCG AACAGGGACT TGAAGCGCAA AGGGAACCA GAGGAGCTCT CTCGACGCAG GACTCGGCTT GCTGAAGCGC GCACGGCAAG
501 AGGCGAGGGG CGGCGACTGG TGAGTACGCC AAAAAATTTG ACTAGCGGAG GCTAGAAGGA GAGAGATGGG TGCGAGAGCG TCAGTATTAA GCGGGGGAGA
601 ATTAGATCGC GATGGGAAAA AATTCGGTTA AGGCCAGGGG GAAAGAAAAA ATATAAATTA AAACATATAG TATGGGCAAG CAGGGAGCTA GAACGATTTC
701 CAGTTAATCC TGGCTGTGTA GAAACATCAG AAGGCTGTAG ACAAATACTG GGACAGCTAC AACCATCCCT TCAGACAGGA TCAGAAGAAC TTAGATCATT

```

|      |             |             |             |             |             |             |             |             |             |             |
|------|-------------|-------------|-------------|-------------|-------------|-------------|-------------|-------------|-------------|-------------|
| 801  | ATATAATACA  | GTAGCAACCC  | TCTATTGTGT  | GCATCAAAGG  | ATAGAGATAA  | AAGACACCAA  | GGAAGCTTTA  | GACAAGATAG  | AGGAAGAGCA  | AAACAAAATG  |
| 901  | AAGACCACCG  | CACAGCAAGC  | GGCCGCTGAT  | CTTCAGACCT  | GGAGGAGGAG  | ATATGAGGGA  | CAATTGGAGA  | AGTGAATTAT  | ATAAATATAA  | AGTAGTAAAA  |
| 1001 | ATTGAACCAT  | TAGGAGTAGC  | ACCCACCAAG  | GCAAAGAGAA  | GAGTGGTGCA  | GAGAGAAAAA  | AGAGCAGTGG  | GAATAGGAGC  | TTTGTTCCTT  | GGGTCTTGGG  |
| 1101 | GAGCAGCAGG  | AAGCACTATG  | GGCGCAGCGT  | CAATGACGCT  | GACGGTACAG  | GCCAGACAAT  | TATTTGCTGG  | TATAGTGCAG  | CAGCAGAACT  | ATTTGTCTGAG |
| 1201 | GGCTATTGAG  | GGCAACACAG  | ATCTGTTGCA  | ACTCACAGTC  | TGGGGCATCA  | AGCAGATCCA  | GGCAAGAATC  | CTGGCTGTGG  | AAAGATACTT  | AAAGGATCAA  |
| 1301 | CAGCTCTGGG  | GGATTTGGGG  | TTGCTCTGGA  | AAACTCATTT  | GCACCACTGC  | TGTGCCTTGG  | AATGTAGTTC  | GGAGTAAATA  | ATCTCTGGAA  | CAGATTTGGA  |
| 1401 | ATCACACGAC  | CTGGATGGAG  | TGGGACAGAG  | AAATTAACAA  | TTACACAAGC  | TTAATACACT  | CCTTAATTGA  | AGAATCGCAA  | AACCAGCAAG  | AAAAGAATGA  |
| 1501 | ACAAGAATTA  | TTGGAATTAG  | ATAAATGGGC  | AAGTTTGTGG  | AATTTGGTTA  | ACATAACAAA  | TTGGCTGTGG  | TATATAAAAT  | TATTCATAAT  | GATAGTAGGA  |
| 1601 | GGCTTTGGTAG | GTTTTAAGAA  | AGTTTTTGTCT | GTACTTTTCTA | TAGTGAATAG  | AGTTAGGCAG  | GGATATTCAC  | CATTATTCGT  | TCAGACCACCT | CTCCAACCC   |
| 1701 | CGAGGGGACC  | CGACAGGCC   | GAAGGAATAG  | AAGAAGAAGG  | TGGAGAGAGA  | GACAGAGACA  | GATCCATTCC  | ATTAGTGAAC  | GGATCTCGAC  | GGTATCGCTA  |
| 1801 | GCTTTTAAAA  | GAAAAGGGGG  | GATTGGGGGG  | TACAGTGCAG  | GGGAAAAGAA  | AGTAGACATA  | ATAGCAACAG  | ACATACAAC   | TAAAGAAATTA | CAAAAACAAA  |
| 1901 | TTACAAAAAT  | TCAAAATTTT  | ACTAGTGATT  | ATCGGATCAA  | CTTTGTATAG  | AAAAGTTGCG  | CTCCGGTGCC  | CGTCAGTGGG  | CAGAGCGCAC  | ATCCGCCACA  |
| 2001 | GTCCCCGAGA  | AGTTGGGGGG  | AGGGGCTGCC  | AATTTGAACCG | GTGCCTAGAG  | AAAAGTTGCG  | GGGTAAACTT  | GGGTAAGTGA  | TGTCGTGTAC  | TGGCTCCGCC  |
| 2101 | TTTTTCCCGA  | GGGTGGGGGA  | GAACCGTATA  | TAAGTGCAGT  | AGTCGCCGTG  | AACGTTCTTT  | TTCCGCAACGG | GTTTGGCCGC  | AGAACACAGG  | TAAGTGCCTT  |
| 2201 | GTGTGGTTCG  | CGCGGGCCTG  | GGCTTCTTAC  | GGGTTATGGC  | CCTTGCCTGC  | TTTGAATTAC  | TTCCACCTGG  | CTGCAGTACG  | TGATTCTTGA  | TCCCGAGCTT  |
| 2301 | CGGTTGGAA   | GTTGGTGGA   | GAGTTCGAGG  | CGCTTCCGCT  | AAAAGGCCCC  | CGTTGCTGTG  | TTCCGCTTGC  | AGGCCTGGCC  | TGGGCGTGG   | TGGGCGCGCC  |
| 2401 | TGCGAATCTG  | GTGGCACCTT  | CGCGCTGTCT  | TCGCTGCTTT  | CGATAAGTCT  | CTAGCCATTT  | AAAAATTTTG  | ATGACCTGCT  | GCGACGTTT   | TTTTCTGGCA  |
| 2501 | AGATAGTCTT  | GTAAATCGCG  | GCCAAGATCT  | GCACACTGGT  | ATTTCCGTTT  | TTGGGGCCGC  | GGGCGGGCAG  | GGGGCCCGTG  | CGTCGCCAGG  | CACATGTTCC  |
| 2601 | CGAGGCGCGG  | CCCTGCGAGC  | GGCCACCCCG  | AGAATCGGAC  | GGGGTAGTCT  | TCAAGTGGC   | CGCCCTGTCT  | CCGCTCTGG   | TCTCCGCCCG  | CCGTGTATCG  |
| 2701 | CCCCGCCCTG  | GGCGGCAAGG  | CTGGCCCGGT  | CGCCACCACT  | TGCGTGAGCG  | GAAAGATGGC  | CGCTTCCCGG  | CCCTGCTGCA  | GGGAGCTCAA  | AATGGAGGAC  |
| 2801 | CGCGCGCTCG  | GGAGAGCGGG  | CGGGTAGATC  | ACCCACACAA  | AGGAAAAGGG  | CCTTTCCTGC  | CTCAGCGCTC  | GCTTCAATG   | ACTCCACGGA  | GTACCGGGCC  |
| 2901 | TCGTCCAGG   | ACCTCGATTA  | GTTCTCGAGC  | TTTTGGAGTA  | CGTCGTTCTT  | AGGTTGGGGT  | GAGGGTTTTT  | ATGCGTATGA  | GTTTCCCCAC  | ACTGAGTGGG  |
| 3001 | CGGACAGTGA  | AGTTAGGCCA  | CTTTGGCACT  | TGATGTAACT  | CTCTTGTGAA  | TTTTGCCCCTT | TTGAGTTTGG  | ATCTTGGTTC  | ATTTCTCAAGC | CTCAGCAGCT  |
| 3101 | GGTCAAAGT   | TTTTTTCTTC  | CATTTGAGT   | GTCGTGACAA  | GTTTGTACAA  | AAAAGCAGGC  | TGCCACC AAT | TCGAATTCTT  | AGCGGATCCA  | ATTGCTCGAG  |
| 3201 | CGAAGAGCGG  | CGCGAAGGTT  | GACAATTAAT  | TAACGTTAAC  | AAACCAGGTA  | TCGATAAAC   | CCAGCTTTCT  | TGTAACAAGT  | GGTGATAACT  | GAATTTCCGAT |
| 3301 | AATCAACCTC  | TGGATTACAA  | AATTTGTGAA  | AGATTGACTG  | GTATTTCTAA  | CTATGTGTCT  | CCTTTTACGC  | TATGTGGATA  | TCTGTCTTTA  | ATGCTTTTGT  |
| 3401 | ATCATGCTAT  | TGCTTCCCGT  | ATGGCTTTC   | TTTTCTCCTC  | CTTGATAAAA  | TCCTGTTTGC  | TGTCTCTTTA  | TGAGGAGTTG  | TGGCCCGTTG  | TCAGGCAACG  |
| 3501 | TGGCGTGGTG  | TGCACTGTGT  | TTTCTGACG   | AACCCCAACT  | GTTTGGGGCA  | TTGCCACCACT | CTGTCAGCTC  | CTTTCCGGGA  | CTTTCCGTTT  | CCCCCTCCCT  |
| 3601 | ATTGCCACGG  | CGGAACCTAT  | CGCCGCTGCG  | CTTCCCGCTC  | GCTGGACAGG  | GGCTCGGCTG  | TTGGGCATCT  | ACAATTCGGT  | GGTGTGTGCG  | GGGAAGCTGA  |
| 3701 | CGTCCCTTTC  | GTGGAGTCTT  | GCCTGTGTTG  | CCACCTGGAT  | TCTGCCTGGG  | ACGCTCTTCT  | GCTACGCTCC  | TTTCCGCCCTC | AATCCAGCGG  | ACCTTCTTTC  |
| 3801 | CGCGGCGCTG  | CTCCGCGCTC  | TGCGGCTCTT  | TCCGCTGCTT  | CGCCTTCGCC  | CTCAGACGAG  | TCGGATCTCC  | CTTTGGCCCG  | CCTCCCGCGA  | TCGGGAATTC  |
| 3901 | CCGCGGTTCC  | AACCGGTTGA  | CATTGATTAT  | TGACTAGTTA  | TTAAATAGTA  | TCAATTACGG  | GGTCATTAGT  | TCATAGCCCA  | TATATGGAGT  | TCCGCGTTAC  |
| 4001 | ATAACTACG   | GTAAGTGGCC  | GCCCTGGCTG  | ACCCGCAAC   | GAACCCGCC   | AATAATGACG  | CGTATAGCAG  | TATGTCCCA   | TAGTAAACGC  | AATAGGGAAT  |
| 4101 | TTCCATTGAC  | GTCAATGGGT  | GGAGTATTTA  | CGGTAACAG   | CCCAGCTGGC  | AGTACATCAA  | GTGTATCATA  | TGCCAAGTAC  | GCCCCCTATT  | GACGTCAATG  |
| 4201 | ACGGTAAAGT  | GCCCCGCTGG  | CATTATGCC   | AGTACATGAC  | CTTATGGGAC  | TTTCTACTTT  | GGCAGTACAT  | CTACGTATTA  | GTCATCGCTA  | TTACCATGTT  |
| 4301 | GATCGGTTTT  | TGGCAGTACA  | TCAATGGGCG  | TGATAGCGG   | TTTGACTCAC  | GGGATTTTCC  | AAGTCTCAC   | CCCATTGACG  | TGAATGGGAG  | TTTTGTGGT   |
| 4401 | CACCAAAATC  | AACGGGACTT  | TCCAATAATG  | CGTAAACAG   | CGGCCCTATT  | GAGCAAAATG  | GGCGGTAGGC  | GTGTACGGTG  | TGAAGTCTAT  | ATAAGCAGAG  |
| 4501 | CTCTCTGGCT  | AACTAGAGAA  | CCCACTGCGC  | CACCATGGTG  | AGCAAGGGCG  | AGGAGGATAA  | CATGGCCATC  | ATCAAGGAGT  | TCATGCGCTT  | CAAGGTGCAC  |
| 4601 | ATGAGGGGCT  | CCGTGAACGG  | CCACGAGTTG  | GAGATCGAGG  | GCGAGGGCGA  | GGCCGCCCCC  | TACGAGGGCA  | CCCAGCCGCG  | CAAGCTGAAG  | GTGACCAAGG  |
| 4701 | GTTGCCCTCC  | CGCCTTCCGC  | TGGGACATCC  | TGTCCCTCA   | TTCATGTATC  | GGCTCFAAGG  | CCTACGTGAA  | GCAACCCGCG  | GACATCCCGC  | ACTACTTAA   |
| 4801 | GCTGTCTTTC  | CCCGAGGGCT  | TCAAGTGGGA  | GCGCGTGATG  | AACTTCGAGG  | ACGGCGCGGT  | GGTGACCGTG  | ACCCAGGACT  | CCTCCCTGCA  | GGACGGCGAG  |
| 4901 | TTCATCTACA  | AGGTGAAGCT  | GCGCGGCACT  | AACTTCCCCT  | CCGACGGCCC  | CGTAAATGCA  | AAGAAAGCCA  | TGGGTGGGA   | GGCCTCCTCC  | GAGCGGATGT  |
| 5001 | ACCCCGAGGA  | CGCCGCTGCG  | AAGGGCGAGA  | TCAAGCAGAG  | GCTGAAGCTG  | AAGACCGCGC  | GCCACTACGA  | CGCTGAGTGC  | AAGACGCTCC  | ACAAGGCTTA  |
| 5101 | GAAAGCCGTG  | CAGCTGCCCG  | GCCTCTACAA  | CGTCAACATG  | AAAGTTGACA  | TACCCTCCCA  | CAACGAGGAC  | TACCACATCG  | TGGAACAGTA  | CGAACGCGCC  |
| 5201 | GAGGGCCGCC  | ACTCCACCCG  | CGGCATGGAC  | GAGCTGTACA  | AGTAAAGTAC  | CCTTAAAGAC  | AATGACTTAC  | AAGGCAGCTG  | TAGATCTTAG  | CCACTTTTTA  |
| 5301 | AAAGAAAAGG  | GGGGACTGGA  | AGGGTAATTT  | CACCTCCAAC  | GAAAGACAAG  | TTCGCTTTTT  | GCTTGTACTG  | GGTCTCTCTG  | GTGAGACCCG  | ATCTGAGCCT  |
| 5401 | GGAGCTCTC   | GTGAAGACTA  | GCGAACCACC  | TGCTTAAAGC  | TCAATAAAGC  | TTCGCTTGA   | TGCTTCAAAG  | TGCTTCAAAG  | GGTCTGTC    | CGTCTGTGG   |
| 5501 | TAAC TAGAGA | TCCCTCAGAC  | CCTTTTAGTC  | AGTGTGGAAA  | ATCTCTAGCA  | GTAGTAGTTC  | ATGTCACTTT  | ATTATTAGT   | ATTTATAACT  | TGCAAGAAA   |
| 5601 | TGAATATCAG  | AGAGTGGAG   | GAATCTGTTT  | ATTGACGTT   | ATAATGGTTA  | CAAATAAAGC  | AATAGCATCA  | CAAATTTTCA  | AAATAAAGCA  | TTTTTTTTAC  |
| 5701 | TGCATCTAG   | TTGTGGTTTT  | TCCAACCTCA  | TCAATGATC   | TTATCATGTC  | TGCTCTAGC   | TATCCCGCCC  | CTAACTCCGC  | CCATCCGCGC  | CCTAACTCCG  |
| 5801 | CCAGTTCCG   | CCCATTCTCC  | GCCCCATGGC  | TGACTAATTT  | TTTTTATTTA  | TGCAGAGGCC  | GAGGCGCCTT  | CGGCCTCTGA  | GCTATTCCAG  | AAGTAGTGAG  |
| 5901 | GAGGCTTTTT  | TGAGGCTACT  | GGGACGTACC  | CAATTCCGCC  | TATAGTGAGT  | CGTATTACGC  | GCCTCACTG   | GCCGTGTTT   | TACAACGTCG  | TGACTGGGAA  |
| 6001 | AACCTGGCCG  | TTACCAACT   | TAATCGCTTT  | CGCAGCATC   | CCCCTTTCG   | CAGCTGGCTG  | AATAGCGAAG  | AGGCCCGCAC  | CGATCGCCCT  | TCCCAACAGT  |
| 6101 | TGCGCAGCGT  | GAATGGGAAA  | TGGGACGCGC  | CCCTGTAGCG  | CGCATATAAG  | CGCGCGGGTG  | TGTTGGTTAC  | GCGCAGCGTG  | ACCGCTACAC  | TTGCCAGCGC  |
| 6201 | CCTAGCGCCC  | GCTCCTTTCG  | CTTTCTTCCC  | TTCCTTTCCT  | GCCACGTTCC  | CCGGCTTTC   | CCGTCAAGCT  | CTAATCCGG   | GGCTCCCTTT  | AGGGTTCCGA  |
| 6301 | TTTGTGTCTT  | TACGGCACTC  | GACCCCAAA   | AAACTTGTAT  | AGGGTGATGG  | TTCACAGTGT  | GGCCCATCGC  | CCTGATAGAC  | GGTTTTTCTG  | CCCTTTGACGT |
| 6401 | TGGAGTCCAT  | GTTCCTTAAAT | AGTGGACTT   | TGTTTCAAAC  | TGGAACAACA  | CTCAACCTTA  | TCTCGGCTA   | TCTTGTGAT   | TTATAAGGGA  | TTTTGCGCAT  |
| 6501 | TTCGCGCTAT  | TGTTAAAAAA  | ATGAGCTGAT  | TTAACAAAA   | TTTAAACGGA  | ATTTTAAACA  | AATATTAACG  | CTTACAATTT  | AGGTGGCACT  | TTTTCGGGAA  |
| 6601 | ATGTGCGCGG  | AACCCCTATT  | TGTTTTATTT  | TCTAAATACA  | TTCAAATATG  | TATCCGCTCA  | TGAGACAATA  | ACCCGATAA   | ATGCTTCAAT  | AATATTGAAA  |
| 6701 | AAGGAAGATG  | ATGAGTATTC  | AACATTTCCG  | TGTCGCCCTT  | ATTCCTTTT   | TTCGCGCAT   | TTGCGCTCT   | GTTTTTGCTC  | ACCCAGAAAT  | GCTGGTGAAA  |
| 6801 | GTAAGAGATG  | CTGAAGATCA  | GTTGGGTGCA  | GTCAGTGGTT  | ACATCGAACT  | GGATCTCAAC  | AGCCTGAA    | TCCTTGAGAG  | TTTTCGCCCC  | GAAGAACGTT  |
| 6901 | TTCCAATGAT  | GAGCACTTTT  | AAAGTCTG    | TATGTGGCG   | GGTATTATCC  | CGTATTGACG  | CCGGGCAAGA  | GCAACTCGGT  | CGCCGCATAC  | ACTATTCTCA  |
| 7001 | GAATGACTTG  | GTTGAGTACT  | CACCACTGTC  | AGAAAAGCAT  | CTTAGCGGAT  | GCATGACAGT  | AAGAAATTA   | TGCAGTGCTG  | CCATAACCCT  | GAGTGATAAC  |
| 7101 | ACTCGGCCA   | ACTTACTTCT  | GACAACGATC  | GGAGGACCGA  | AGGACCTAAC  | CGCTTTTTTG  | CACAAATG    | GGATCATGT   | AACTCGCCTT  | GATCGTTGGG  |
| 7201 | AACCGGAGCT  | GAATGAAGCC  | ATACCAAACG  | ACGAGCGTGA  | CACCACGATG  | CCTGTAGCAA  | TGGCAACAA   | GTTGCGCAAA  | CTATTAACCTG | GCGAACTACT  |
| 7301 | TACTCTAGCT  | TCCCGGCAAC  | AATTAATAGA  | CTGGATGGAG  | GCGGATAAAG  | TTGCAGGACC  | ACTTTGCGC   | TCGGCCCTTC  | CGGCTGGCTG  | GTTTATGGCT  |
| 7401 | GATAAATCTG  | GAGCGGGTGA  | CGTGGGTCTG  | CGGCTATCA   | TGTCAGACT   | GGGCCAGAT   | GGTAAGCCCT  | CCGCTATCGT  | AGTTATCTAC  | ACGACGGGGA  |
| 7501 | GTCAGGCAAC  | TATGGATGAA  | CGAAAATGAC  | AGATGCTGTA  | GATAGGTGCC  | TCACTGATTA  | AGCATTGTTA  | ACTGTACAGC  | CAAGTTTTACT | CATATATACT  |
| 7601 | TTAGATTGAT  | TTAAAACCTC  | ATTTTTAATT  | TAAAAGGATC  | TAGGTGAAGA  | TCCTTTTTGA  | TAATCTCATG  | ACCAAAATCC  | CTTAACGTGA  | GTTTTCTGCT  |
| 7701 | CACGTAGGCT  | CAGACCCTGC  | AGAAAAGATC  | AAAGGATCTT  | TTTTGAGATCC | TTTTTTTCTG  | CGCGTAATCT  | GCTGCTTGGA  | AACAAAAGAA  | CCACCCTTAC  |
| 7801 | CAGCGGTGGT  | TTGTTTGGCG  | GATCAAGAGC  | TACCAACTCT  | TTTTCCGAA   | GTAACTTGCT  | TACAGCAGAG  | GCTAGTACCA  | AAACTGTCTT  | TTCTAGTGT   |
| 7901 | GCCGTAGTTA  | GGCCACCACT  | TCAAGAACTC  | TGTAGCACCG  | CCTACATACT  | TCGCTCTGCT  | AATCCTGTTA  | CCAGTGGCTG  | CTGCCAGTGG  | CGATAAGTCG  |
| 8001 | TGCTTACCG   | GGTTGGACTC  | AAGACGATAG  | TTACCGGATA  | AGGGGACGCG  | GTGCGGCTGA  | ACGGGGGTT   | CGTGCACATA  | GCCCAGTCTG  | GAGCGAACGA  |
| 8101 | CCTACACAGA  | ACTGAGATAC  | CTACAGCGTG  | AGCTATGAGA  | AAGGCCACG   | CTGGCCGGA   | AGAAAGAGG   | GGACAGGATG  | CCGGTAAAGC  | GCAGGGCTCG  |
| 8201 | AACAGGAGAG  | CGCACGAGGG  | AGCTTCCAGG  | GGGAAACGCC  | TGGTATCTTT  | ATAGTCTGTG  | CGGGTTTCCG  | CACCTCTGAC  | TTGAGCGTGC  | ATTTTTGTGA  |
| 8301 | TGCTCGTACG  | GGGGCGGAG   | CCTATGGAAA  | AACGCGAGCA  | ACGCGGCCCT  | TTTACGGTTC  | CTGGCCTTTT  | GCTGGCCTTT  | TGCTCACATG  | TTCTTTCTGG  |
| 8401 | CGTTATCCCC  | TGATTTCTGT  | GATAACCGTA  | TTACTCCCTT  | TGATGTGAGT  | GATACGCTTC  | GCCGACGCGC  | AACGACCAGG  | CGCACGAGT   | CAGTGAGCGG  |
| 8501 | GGAAGCGGAA  | GAGCGCCCAA  | TACGCAAACT  | GTACCTTCCC  | GCGGCTTGGC  | GATTTTCAATA | ATGCAGCTGG  | CACGACAGG   | TTCCGCGAGT  | GAAAGCGGCC  |
| 8601 | AGTGAGCGCA  | ACGCAATTA   | TGTGAGTTAG  | CTCACTCATT  | AGGCACCCA   | GGCTTTACAC  | TTTATGCTTC  | CGGCTCGTAT  | GTTGTGTGGA  | ATTGTGAGCG  |
| 8701 | GATAACAATT  | TCACACAGGA  | AACAGCTATG  | ACCATGATTA  | CGCCAAGCGC  | GCAATTAACC  | CTCACTAAAG  | GGAAACAAA   | CTGGAGCTGC  | AAGCTT      |

## Validation by Restriction Enzyme Digestion

| Cutters    | Locations                                | Fragments (bp)                       |
|------------|------------------------------------------|--------------------------------------|
| PacI       | 3231                                     | 8796                                 |
| HpaI       | 3238                                     | 8796                                 |
| ApaI       | 3511, 4596, 6827, 8073                   | 1085, 2231, 1246, 4234               |
| BamHI      | 3185                                     | 8796                                 |
| EcoRI      | 3174, 3292, 3896                         | 118, 604, 8074                       |
| ApaI+HpaI  | 3238, 3511, 4596, 6827, 8073             | 273, 1085, 2231, 1246, 3961          |
| ApaI+PacI  | 3231, 3511, 4596, 6827, 8073             | 280, 1085, 2231, 1246, 3954          |
| ApaI+BamHI | 3185, 3511, 4596, 6827, 8073             | 326, 1085, 2231, 1246, 3908          |
| ApaI+EcoRI | 3174, 3292, 3511, 3896, 4596, 6827, 8073 | 118, 219, 385, 700, 2231, 1246, 3897 |

## Vector Summary

|                             |                                                    |
|-----------------------------|----------------------------------------------------|
| Vector ID                   | VB170517-1081qhz                                   |
| Vector Name                 | pLV[Exp]-mCherry-EF1A>hCENPA[NM_001809.3]          |
| Date Created (Pacific Time) | 2017-05-17                                         |
| Size                        | 9128 bp                                            |
| Vector Type                 | Lentivirus gene expression vector (3rd generation) |
| Inserted Promoter           | EF1A                                               |
| Inserted ORF                | hCENPA[NM_001809.3]                                |
| Inserted Marker             | mCherry                                            |
| Plasmid Copy Number         | High                                               |
| Antibiotic Resistance       | Ampicillin                                         |
| Cloning Host                | Stbl3                                              |
| Vector Description          | <i>None</i>                                        |

## Vector Map

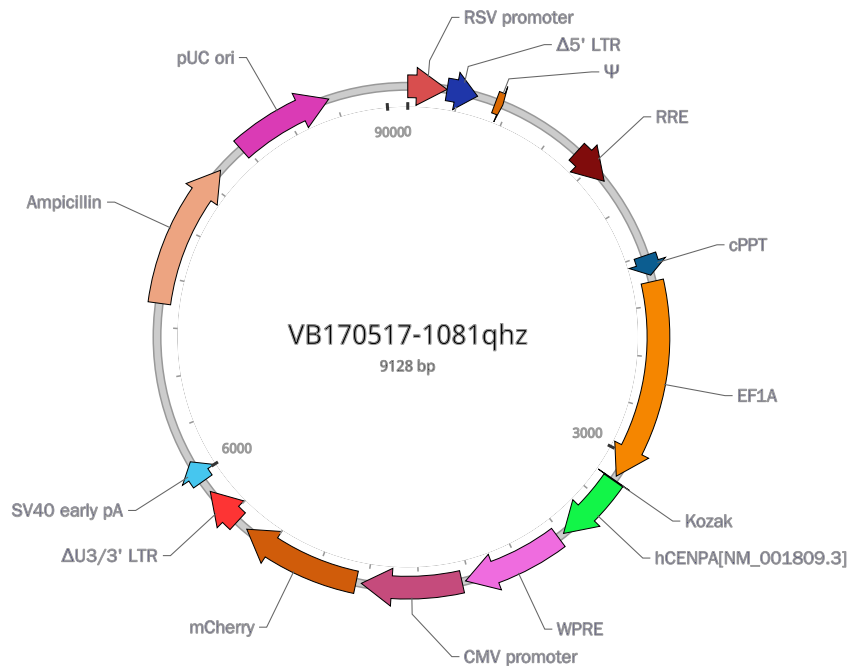

## Vector Components

| Name                       | Position    | Size (bp) | Type          | Description                                                      | Application Notes                                                                                                                                                                            |
|----------------------------|-------------|-----------|---------------|------------------------------------------------------------------|----------------------------------------------------------------------------------------------------------------------------------------------------------------------------------------------|
| RSV promoter               | ■ 1-229     | 229       | Promoter      | Rous sarcoma virus enhancer/promoter                             | Strong promoter; drives transcription of viral RNA in packaging cells.                                                                                                                       |
| Δ5' LTR                    | ■ 230-410   | 181       | LTR           | Truncated HIV-1 5' long terminal repeat                          | Allows transcription of viral RNA and its packaging into virus.                                                                                                                              |
| Ψ                          | ■ 521-565   | 45        | Miscellaneous | HIV-1 packaging signal                                           | Allows packaging of viral RNA into virus.                                                                                                                                                    |
| RRE                        | ■ 1075-1308 | 234       | Miscellaneous | HIV-1 Rev response element                                       | Rev protein binding site that allows Rev-dependent nuclear export of viral RNA during viral packaging.                                                                                       |
| cPPT                       | ■ 1803-1920 | 118       | Miscellaneous | Central polypurine tract                                         | Facilitates the nuclear import of HIV-1 cDNA through a central DNA flap.                                                                                                                     |
| <b>EF1A</b>                | ■ 1959-3137 | 1179      | Promoter      | Human eukaryotic translation elongation factor 1 α1 promoter     | Strong promoter.                                                                                                                                                                             |
| Kozak                      | ■ 3162-3167 | 6         | Miscellaneous | Kozak translation initiation sequence                            | Facilitates translation initiation of ATG start codon downstream of the Kozak sequence.                                                                                                      |
| <b>hCENPA[NM_001809.3]</b> | ■ 3168-3590 | 423       | ORF           | <i>None</i>                                                      | <i>None</i>                                                                                                                                                                                  |
| WPRE                       | ■ 3629-4226 | 598       | Miscellaneous | Woodchuck hepatitis virus posttranscriptional regulatory element | Enhances viral RNA stability in packaging cells, leading to higher titer of packaged virus.                                                                                                  |
| CMV promoter               | ■ 4248-4835 | 588       | Promoter      | Human cytomegalovirus immediate early enhancer/promoter          | Strong promoter; may have variable strength in some cell types.                                                                                                                              |
| <b>mCherry</b>             | ■ 4867-5577 | 711       | ORF           | Variant of mRFP1 generated by mutagenesis                        | Commonly used red fluorescent protein; fast maturation compared to its predecessor, mRFP1.                                                                                                   |
| ΔU3/3' LTR                 | ■ 5648-5882 | 235       | LTR           | Truncated HIV-1 3' long terminal repeat                          | Allows packaging of viral RNA into virus; self-inactivates the 5' LTR by a copying mechanism during viral genome integration; contains polyadenylation signal for transcription termination. |
| SV40 early pA              | ■ 5955-6089 | 135       | PolyA_signal  | Simian virus 40 early polyadenylation signal                     | Allows transcription termination and polyadenylation of mRNA transcribed by Pol II RNA polymerase.                                                                                           |
| Ampicillin                 | ■ 7043-7903 | 861       | ORF           | Ampicillin resistance gene                                       | Allows E. coli to be resistant to ampicillin.                                                                                                                                                |
| pUC ori                    | ■ 8074-8662 | 589       | rep_origin    | pUC origin of replication                                        | Facilitates plasmid replication in E. coli; regulates high-copy plasmid number (500-700).                                                                                                    |

**Note:** Components added by user are listed in **bold red** text.

## Vector Sequence

```

1  AATGTAGTCT TATGCAATAC TCTTGTAGTC TTGCAACATG GTAACGATGA GTTAGCAACA TGCCTTACAA GGAGAGAAAA AGCACCGTGC ATGCCGATTG
101 GTGGAAGTAA GGTGGTACGA TCGTGCCTTA TTAGGAAGGC AACAGACGGG TCTGACATGG ATTGGACGAA CCACTGAATT GCCGCATTGC AGAGATATTG
201 TATTTAAGTG CCTAGCTCGA TACATAAACG GGTCTCTCTG GTTAGACCAG ATCTGAGCCT GGGAGCTCTC TGGCTAACTA GGAACCCAC TGCTTAAGCC
301 TCAATAAAGC TTGCCTTGAG TGCTTCAAGT AGTGTGTGCC CGTCTGTTGT GTGACTCTGG TAACTAGAGA TCCCTCAGAC CCTTTAGTC AGTGTGGAAA
401 ATCTCTAGCA GTGGCGCCCG AACAGGGACT TGAAAGCGAA AGGGAACCA GAGGAGCTCT CTCGACGCAG GACTCGGCTT GCTGAAGCGC GCACGGCAAG

```

Table with 12 columns of DNA sequence data, numbered 501 to 8801. Each row contains a sequence of 12 nucleotide strings.



```

8901 GGCACGACAG GTTTCCCGAC TGGAAAGCGG GCAGTGAGCG CAACGCAATT AATGTGAGTT AGCTCACTCA TTAGGCACCC CAGGCTTTAC ACTTTATGCT
9001 TCCGGCTCGT ATGTTGTGTG GAATTGTGAG CGGATAACAA TTTCACACAG GAAACAGCTA TGACCATGAT TACGCCAAGC GCGCAATTAA CCCTCACTAA
9101 AGGGAACAAA AGCTGGAGCT GCAAGCTT
  
```

### Validation by Restriction Enzyme Digestion

| Cutters      | Locations                          | Fragments (bp)                   |
|--------------|------------------------------------|----------------------------------|
| XhoI         | 2925                               | 9128                             |
| AgeI         | 2038                               | 9128                             |
| SpeI         | 1922, 4266                         | 2344, 6784                       |
| ApaLI        | 3843, 4928, 7159, 8405             | 1085, 2231, 1246, 4566           |
| DraIII       | 2996, 6691                         | 3695, 5433                       |
| ApaLI+XhoI   | 2925, 3843, 4928, 7159, 8405       | 918, 1085, 2231, 1246, 3648      |
| ApaLI+AgeI   | 2038, 3843, 4928, 7159, 8405       | 1805, 1085, 2231, 1246, 2761     |
| ApaLI+SpeI   | 1922, 3843, 4266, 4928, 7159, 8405 | 1921, 423, 662, 2231, 1246, 2645 |
| ApaLI+DraIII | 2996, 3843, 4928, 6691, 7159, 8405 | 847, 1085, 1763, 468, 1246, 3719 |
