# Supplementary material for: The role of the histone H3 variant CENPA in prostate cancer
Source: PubMed Central journal article supplement (PMC7307189; doi:10.1074/jbc.ra119.010080), 2020-05-05
Supplement: supp_RA119.010080_154133_2_supp_523866_q9t4nb.pdf [file supp_RA119.010080_154133_2_supp_523866_q9t4nb.pdf]

**Non-canonical function of CENPA as a regulator of gene expression in prostate cancer**

Anjan K. Saha, Rafael Contreras-Galindo, Yashar S. Niknafs, Matthew Iyer, Tingting Qin, Karthik Padmanabhan, Javed Siddiqui, Monica Palande, Claire Wang, Brian Qian, Elizabeth Ward, Tara Tang, Scott Tomlins, Scott Gitlin, Maureen Sartor, Gil S. Omenn, Arul M. Chinnaiyan, and David M. Markovitz

**This PDF file includes:**

Supplemental Figures 1 to 6  
Captions for Supplemental Figures 1 to 6  
Tables S1 to S3

**Other supplementary materials for this manuscript include the following:**

Datasets S1 to S4  
Plasmid Specifications

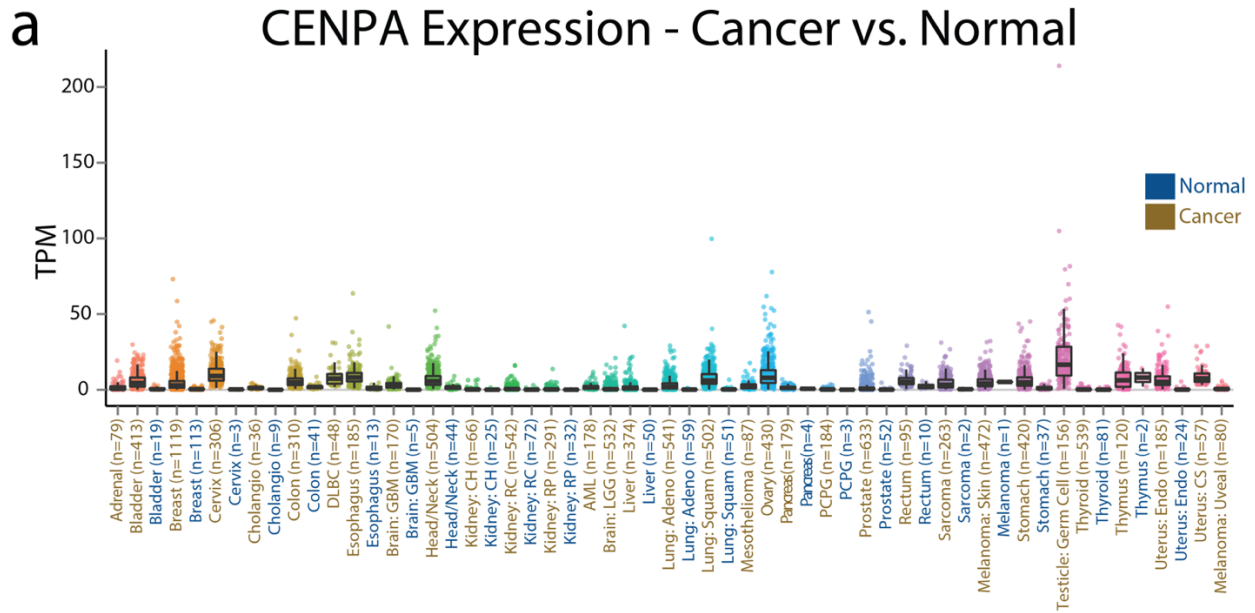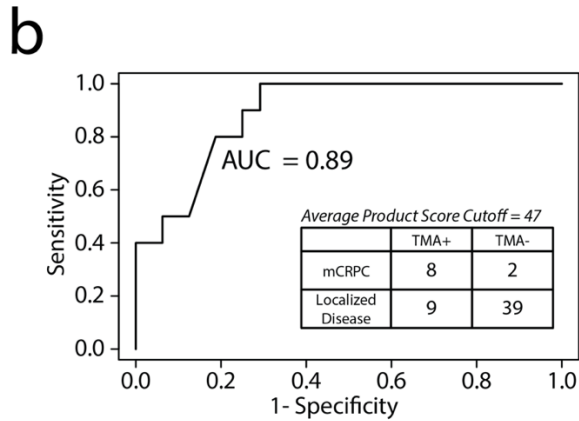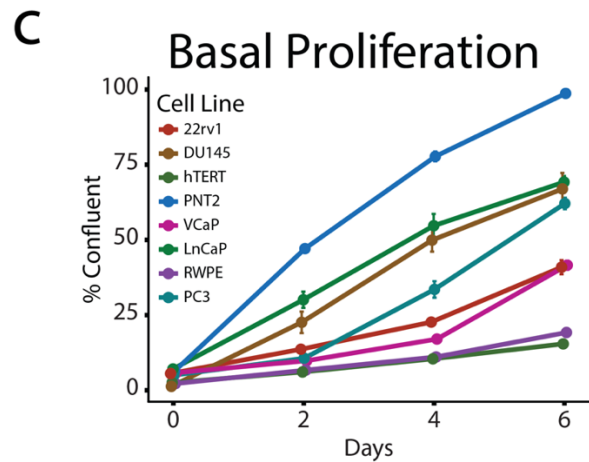

**Supplementary Figure 1.** Characterization of CENPA in cellular proliferation, and cancer. (A) Cancer vs. normal analysis conducted across a curated RNA-seq catalogue querying tissue CENPA levels by SSEA. (B) Receiver operator characteristic (ROC) separating metastatic castration resistant prostate cancer (mCRPC) from localized disease by CENPA staining in a tissue microarray. (C) Proliferation rates of a panel of prostate cancer (LNCaP, VCaP, 22rv1, DU145, and PC3) and benign prostatic epithelial (RWPE-1, 957E-hTERT, and PNT2) cell lines.

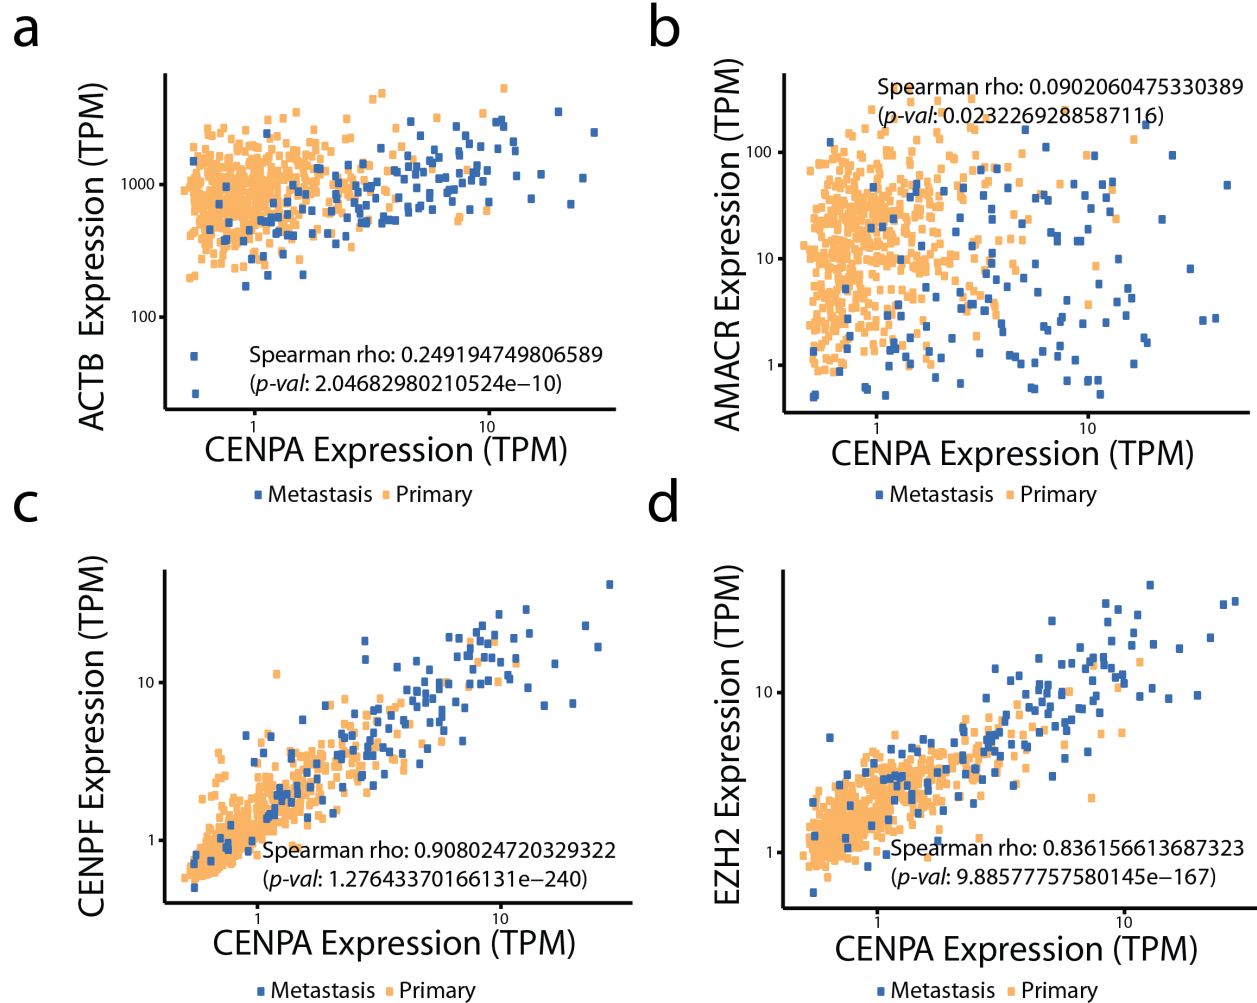

**Supplementary Figure 2.** Transcriptome-wide correlation against CENPA mRNA levels in prostate cancer. (A-D) Individual scatterplots depicting correlation strength between CENPA expression, previously characterized prostate cancer pathogenesis factors (AMACR, CENPF, and EZH2) and a housekeeping control gene (ACTB).

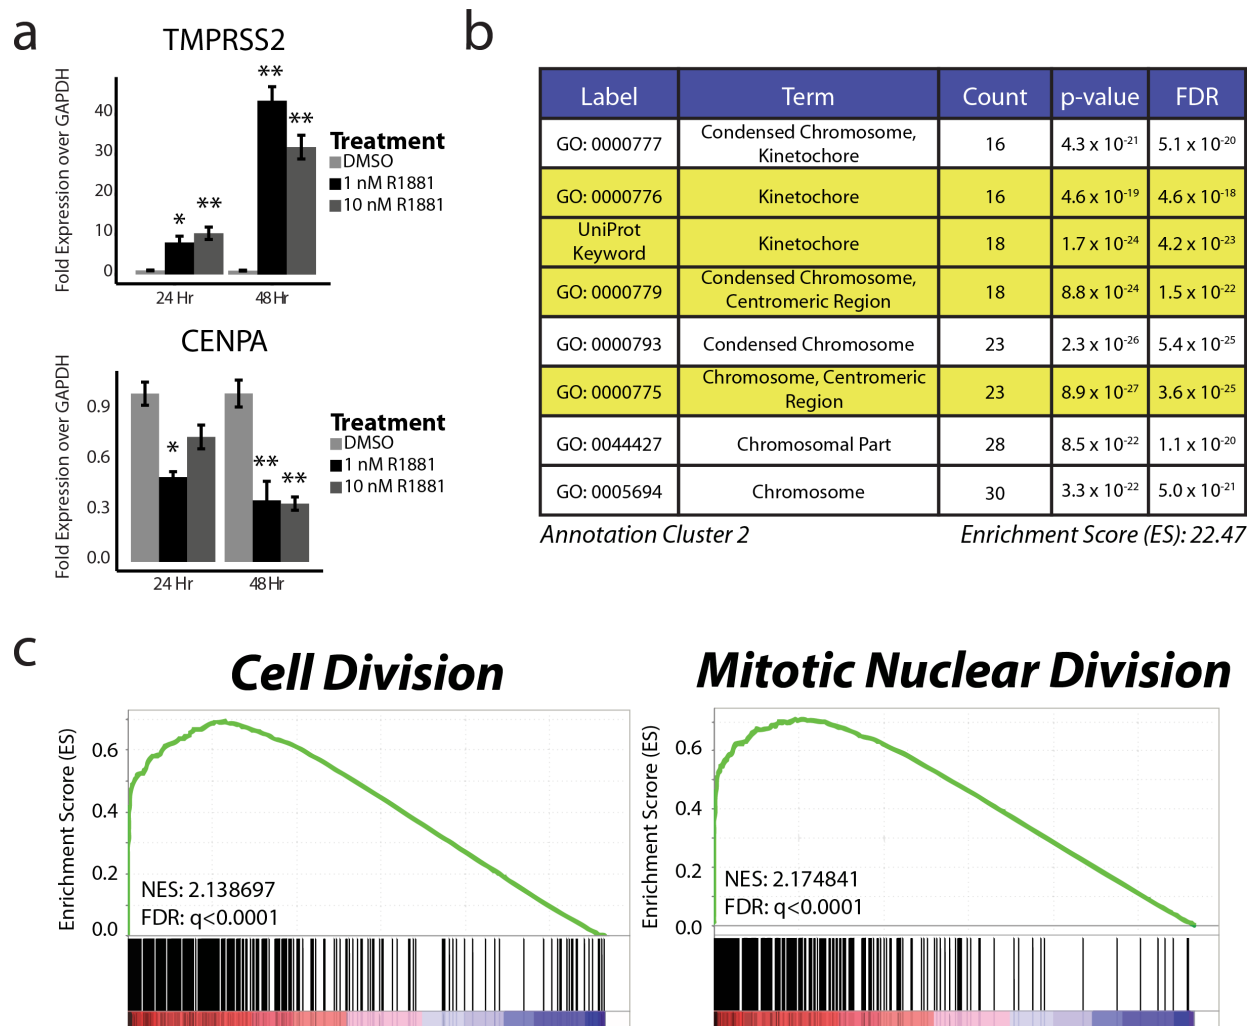

**Supplementary Figure 3.** Association between CENPA mRNA levels and cell division in prostate cancer. (A) VCaP prostate cancer cell lines treated with the androgen agonist R1881 and evaluated for CENPA and Tmprss2 (androgen-responsive positive control) expression by qRT-PCR. \*P<0.05, \*\*P<0.01, comparing to DMSO for each condition and time point via Student's t-test. (B) Additional biological concepts identified as associated with CENPA expression through functional annotation analysis using DAVID, highlighting enrichments in concepts important for centromeric and kinetochore integrity. (C) Representative enrichment plots from GSEA of “Cell Division” (left) and “Mitotic Nuclear Division” (right) gene signatures conducted on transcriptome-wide correlation values pre-ranked by the strength of correlation.

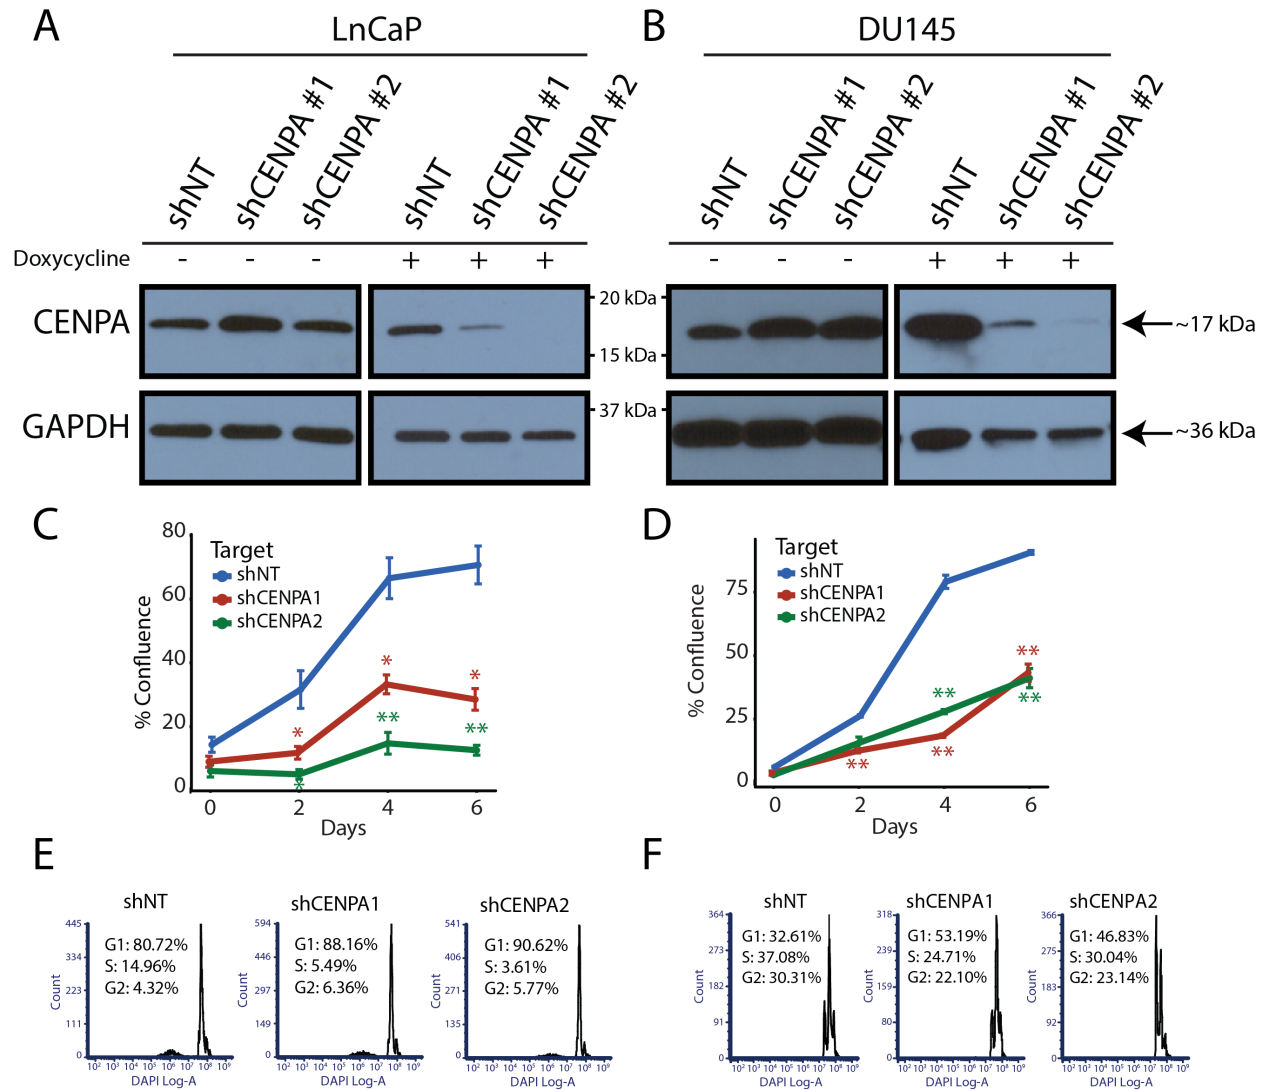

**Supplementary Figure 4.** Panel of prostate cancer cell lines subjected to CENPA depletion. (A, B) Immunoblot for CENPA and GAPDH in LnCaP and DU145 cells expressing a doxycycline inducible vector encoding a non-targeted and two independent CENPA-targeted shRNAs. (C, D) Growth curve depicting proliferation over 7 days following doxycycline induction in CENPA knockdown cell lines (left – LnCaP, right – DU145). Error bars represent the standard error of three biologic replicates. \* $P < 0.05$ , \*\* $P < 0.01$ , comparing to shNT for each condition via Student's t-test. (E, F) Cell cycle analysis with DAPI in CENPA shRNA-depleted LnCaP and DU145 cells compared to shNT.

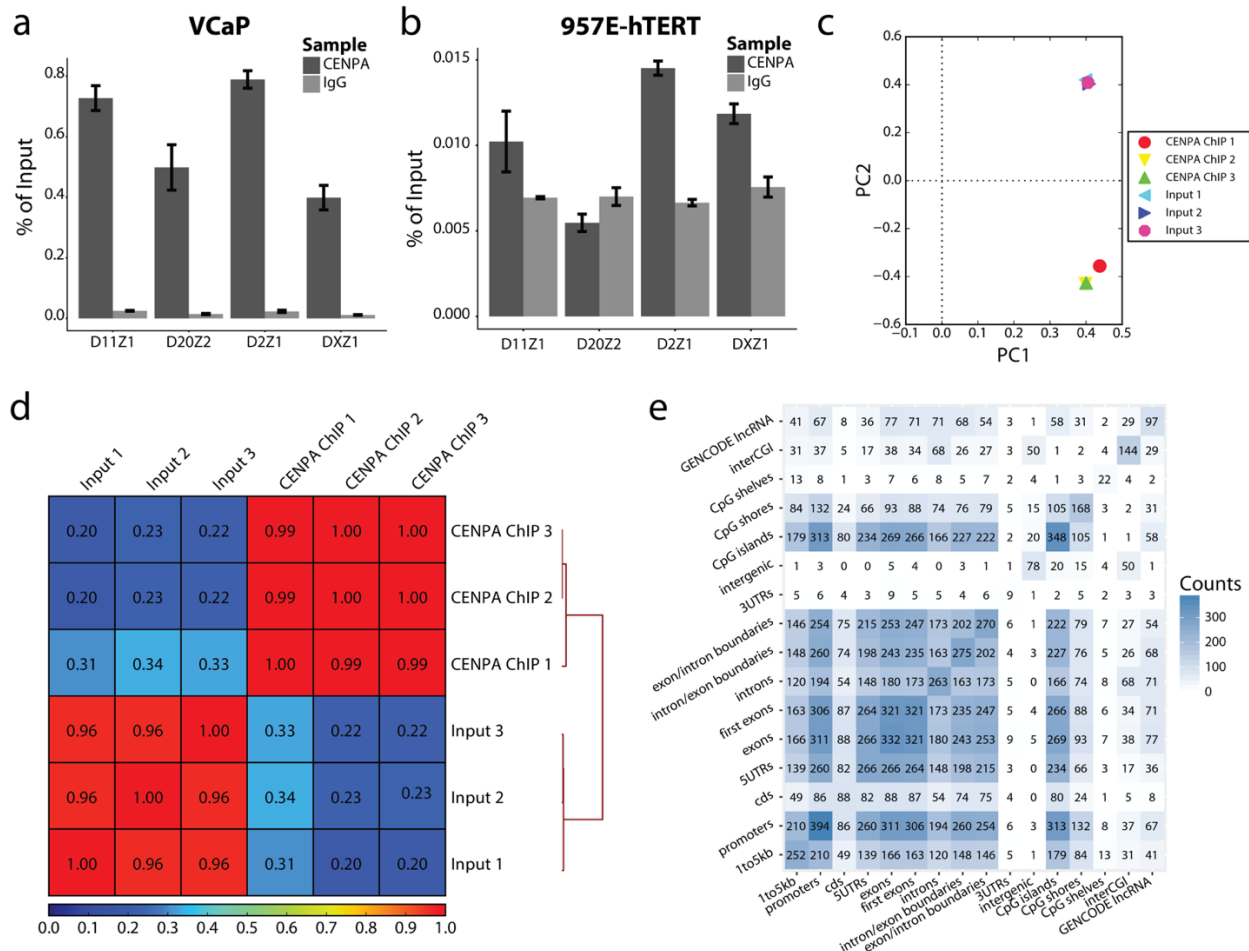

**Supplementary Figure 5.** CENPA N-ChIP-seq validation. (A) Validation of native chromatin immunoprecipitation (N-ChIP) efficiency of CENPA, through PCR targeting individual centromeric repeats. (B) N-ChIP-PCR conducted in benign prostatic epithelial cell line 957E-hTERT. (C) Principal Component Analysis (PCA) to determine variation in N-ChIP-seq replicates. (D) Heatmap depicting correlation strength between each individual N-ChIP-seq sample. Bottom left and top right indicate near perfect consistency between ChIP and input replicates, further validated by the unsupervised hierarchical clustering (see dendrogram along the vertical component). (E) Matrix depicting the degree of overlap of CENPA occupancy between different genomic regions. Abbreviations: CDS – coding sequence, UTR – untranslated region, CGI – CpG Island.

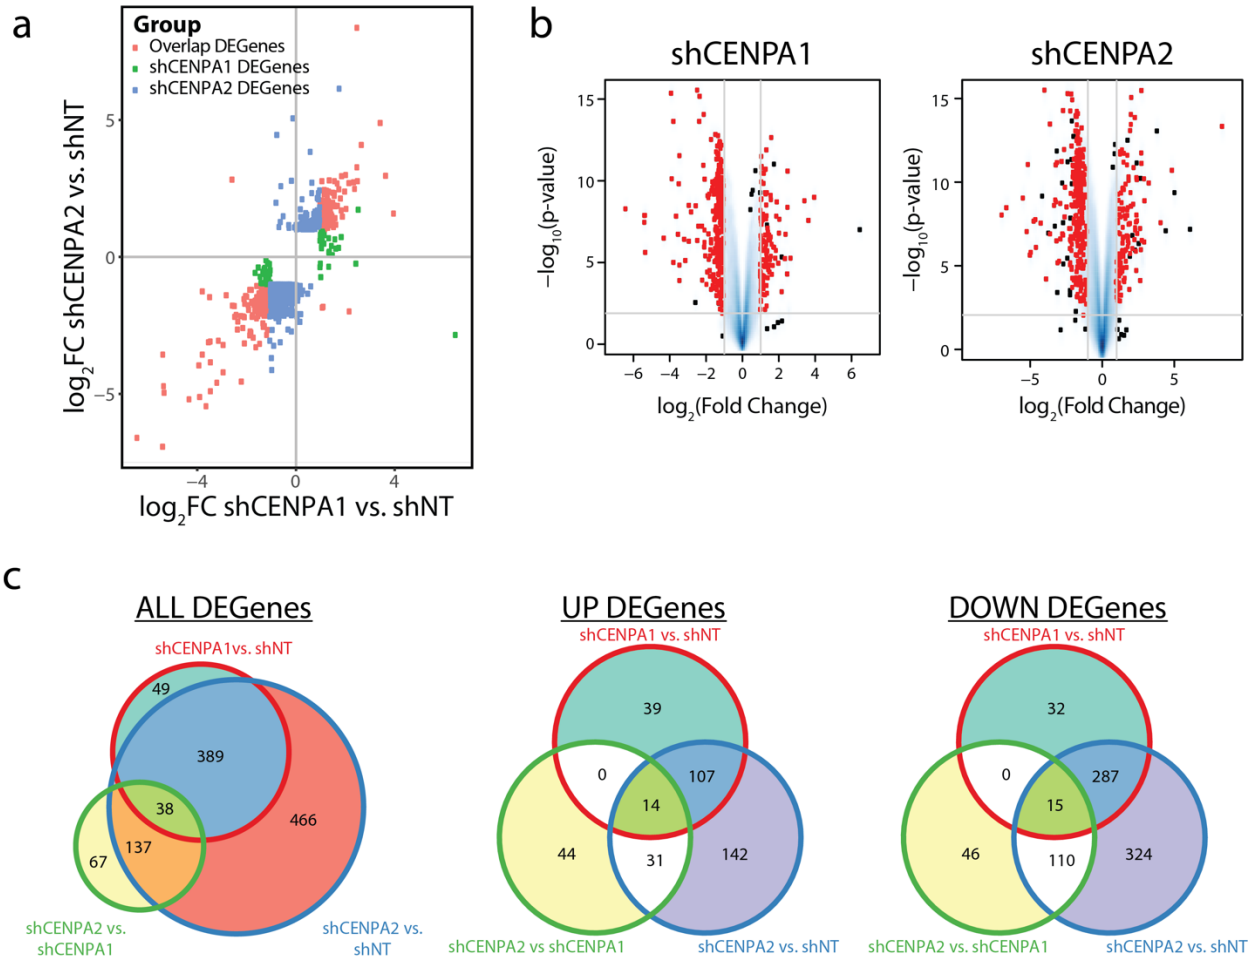

**Supplementary Figure 6.** CENPA-depletion RNA-seq quality control. (A) Scatterplot comparing the directionality of differentially expressed genes from the two independent CENPA-targeted shRNAs. (B) Volcano plot depicting significance against fold change (FC) between shNT and two independent CENPA-targeted shRNAs. Genes that satisfied the absolute FC > 1.5 (blue lines) and p-value < 0.01 (top right and top left) criteria were considered differentially expressed. (C) Venn diagrams illustrating the overlap in differential gene expression by comparison of analysis pairs for all differentially expressed genes (DEGs), upregulated DEGs and downregulated DEGs.

**Table S1. Cancer vs. normal sample set enrichment analysis performed across tissue types for tissue CENPA expression**

\*CH: Chromophobe Renal Cell Carcinoma; GBM: Glioblastoma multiforme

| <i>Tissue Type</i>      | <i>Enrichment Score (ES)</i> | <i>Normalized ES (NES)</i> | <i>FDR</i>  | <i>Percentile</i> |
|-------------------------|------------------------------|----------------------------|-------------|-------------------|
| Uterus: Endometrial     | 0.824                        | 4.45                       | <<<<0.00001 | 0.993             |
| Prostate                | 0.620                        | 4.76                       | <<<<0.00001 | 0.987             |
| Kidney: CH*             | 0.544                        | 2.61                       | 0.00126     | 0.882             |
| Colon                   | 0.827                        | 5.88                       | <<<<0.00001 | 0.982             |
| Bladder                 | 0.754                        | 3.98                       | <<<<0.00001 | 0.995             |
| Thyroid                 | 0.277                        | 2.61                       | 0.000383    | 0.655             |
| Lung: Squamous          | 0.986                        | 7.85                       | <<<<0.00001 | 0.999             |
| Esophagus               | 0.865                        | 3.59                       | <<<<0.00001 | 0.997             |
| Head/Neck               | 0.829                        | 6.20                       | <<<<0.00001 | 0.999             |
| Stomach                 | 0.770                        | 5.35                       | <<<<0.00001 | 0.992             |
| Breast                  | 0.796                        | 9.42                       | <<<<0.00001 | 0.996             |
| Rectum                  | 0.689                        | 2.52                       | 0.00277     | 0.906             |
| Kidney: Renal Cell      | 0.758                        | 6.88                       | <<<<0.00001 | 0.975             |
| Cholangiocarcinoma      | 1.00                         | 3.38                       | <<<<0.00001 | 0.867             |
| Kidney: Renal Papillary | 0.758                        | 4.51                       | <<<<0.00001 | 0.984             |
| Lung: Adenocarcinoma    | 0.864                        | 7.15                       | <<<<0.00001 | 0.993             |
| Liver                   | 0.905                        | 6.73                       | <<<<0.00001 | 0.995             |
| Brain: GBM*             | 1.00                         | 2.66                       | 3.06E-06    | 0.967             |



**Table S2. Sample set enrichment analyses comparing expression levels of centromere and kinetochore genes in normal prostate tissues, primary prostate cancers, and metastatic prostate cancers.**

| <i>Transcript ID</i> | <i>Comparison Name</i> | <i>Enrichment Score (ES)</i> | <i>Normalized Enrichment Score (NES)</i> | <i>FDR</i> | <i>Percentile</i> |
|----------------------|------------------------|------------------------------|------------------------------------------|------------|-------------------|
| ENSG00000115163.13   | Metastasis vs. Primary | 0.677                        | 7.64                                     | <<<0.00001 | 0.982             |
| ENSG00000115163.13   | Metastasis vs. Normal  | 0.831                        | 5.60                                     | <<<0.00001 | 0.984             |
| ENSG00000115163.13   | Cancer vs. Normal      | 0.620                        | 4.76                                     | <<<0.00001 | 0.987             |
| ENSG00000129810.13   | Metastasis vs. Primary | 0.734                        | 8.11                                     | <<<0.00001 | 0.988             |
| ENSG00000129810.13   | Metastasis vs. Normal  | 0.855                        | 5.90                                     | <<<0.00001 | 0.989             |
| ENSG00000129810.13   | Cancer vs. Normal      | 0.474                        | 3.71                                     | 4.43E-07   | 0.946             |
| ENSG00000117724.11   | Metastasis vs. Primary | 0.674                        | 7.85                                     | <<<0.00001 | 0.985             |
| ENSG00000117724.11   | Metastasis vs. Normal  | 0.832                        | 5.96                                     | <<<0.00001 | 0.990             |
| ENSG00000117724.11   | Cancer vs. Normal      | 0.552                        | 4.37                                     | <<<0.00001 | 0.976             |
| ENSG00000123485.10   | Metastasis vs. Primary | 0.656                        | 7.61                                     | <<<0.00001 | 0.982             |
| ENSG00000123485.10   | Metastasis vs. Normal  | 0.845                        | 5.73                                     | <<<0.00001 | 0.986             |
| ENSG00000123485.10   | Cancer vs. Normal      | 0.643                        | 5.05                                     | <<<0.00001 | 0.992             |
| ENSG00000138778.10   | Metastasis vs. Primary | 0.704                        | 8.10                                     | <<<0.00001 | 0.988             |
| ENSG00000138778.10   | Metastasis vs. Normal  | 0.875                        | 6.13                                     | <<<0.00001 | 0.993             |
| ENSG00000138778.10   | Cancer vs. Normal      | 0.450                        | 3.64                                     | 4.43E-07   | 0.941             |
| ENSG00000151725.10   | Metastasis vs. Primary | 0.605                        | 7.06                                     | <<<0.00001 | 0.975             |
| ENSG00000151725.10   | Metastasis vs. Normal  | 0.803                        | 5.75                                     | <<<0.00001 | 0.987             |
| ENSG00000151725.10   | Cancer vs. Normal      | 0.469                        | 3.76                                     | 4.43E-07   | 0.948             |
| ENSG00000102384.12   | Metastasis vs. Primary | 0.682                        | 7.74                                     | <<<0.00001 | 0.983             |
| ENSG00000102384.12   | Metastasis vs. Normal  | 0.849                        | 5.84                                     | <<<0.00001 | 0.988             |
| ENSG00000102384.12   | Cancer vs. Normal      | 0.309                        | 2.42                                     | 0.00349    | 0.829             |

|                    |                           |       |      |            |       |
|--------------------|---------------------------|-------|------|------------|-------|
| ENSG00000123219.11 | Metastasis vs.<br>Primary | 0.655 | 7.49 | <<<0.00001 | 0.981 |
| ENSG00000123219.11 | Metastasis vs.<br>Normal  | 0.759 | 5.22 | <<<0.00001 | 0.975 |
| ENSG00000123219.11 | Cancer vs.<br>Normal      | 0.214 | 1.68 | 0.121      | 0.708 |

**Table S3. Primers used in this study**

| <i>Direction</i> | <i>Target</i> | <i>Method</i> | <i>Sequence</i>         |
|------------------|---------------|---------------|-------------------------|
| GAPDH F          | GAPDH         | qRT-PCR       | ACATCGCTCAGACACCATG     |
| GAPDH R          | GAPDH         | qRT-PCR       | TGTAGTTGAGGTCAATGAAGGG  |
| CENPA F          | CENPA         | qRT-PCR       | GTGTGGACTTCAATTGGCAAG   |
| CENPA R          | CENPA         | qRT-PCR       | TGCACATCCTTTGGGAAGAG    |
| TMPRSS2 F        | TMPRSS2       | qRT-PCR       | CCTGCAGGGACATGGGCTATA   |
| TMPRSS2 R        | TMPRSS2       | qRT-PCR       | CCGGCACTTGTGTTTCAGTTTC  |
| D2Z1 F           | D2Z1          | ChIP-PCR      | TCGTTGGAAACGGGATTGT     |
| D2Z1 R           | D2Z1          | ChIP-PCR      | CTGCTCTATGAAAGGGACTGTT  |
| D11Z1 F          | D11Z1         | ChIP-PCR      | CTTCCTTCGAAACGGGTATATCT |
| D11Z1 R          | D11Z1         | ChIP-PCR      | GCTCCATCAGCAGGATTGT     |
| DXZ1 F           | DXZ1          | ChIP-PCR      | CGGGATCACCTTCCCATAAC    |
| DXZ1 R           | DXZ1          | ChIP-PCR      | GGTGTGCAAACCTGAACTATC   |
| D20Z2 F          | D20Z2         | ChIP-PCR      | TGCTTGGAAACGGGAATGT     |
| D20Z2 R          | D20Z2         | ChIP-PCR      | CCTGCTCTATGAAAGGGAATGT  |
